# Supplementary material for: Unraveling the potential mechanisms of the anti-osteoporotic effects of the Achyranthes bidentata–Dipsacus asper herb pair: a network pharmacology and experimental study
Source: Front Pharmacol. 2023 Oct 2;14:1242194. doi: 10.3389/fphar.2023.1242194 (PMC10577322; doi:10.3389/fphar.2023.1242194)
Supplement: Supplementary file 7 [file Table1.XLSX]

## Sheet: AB
TCMSP
MOL ID	Molecule Name		MW	OB	DL	Pubchem Cid	InChIKey
MOL000057	DIBP	DIISOBUTYL PHTHALATE	278.38	49.63	0.13	6782	MGWAVDBGNNKXQV-UHFFFAOYSA-N
MOL000069	palmitic acid		256.48	19.3	0.1	985	IPCSVZSSVZVIGE-UHFFFAOYSA-N
MOL000084	beta-daucosterol		576.95	20.63	0.63	5742590	NPJICTMALKLTFW-OFUAXYCQSA-N
MOL000085	beta-daucosterol_qt		414.79	36.91	0.75	NA	KZJWDPNRJALLNS-RWAAMKJNSA-N
MOL000098	quercetin		302.25	46.43	0.28	5280343	REFJWTPEDVJJIY-UHFFFAOYSA-N
MOL000172	Furol		96.09	34.35	0.01	7362	HYBBIBNJHNGZAN-UHFFFAOYSA-N
MOL000173	wogonin		284.28	30.68	0.23	5281703	XLTFNNCXVBYBSX-UHFFFAOYSA-N
MOL000263	oleanolic acid		456.78	29.02	0.76	10494	MIJYXULNPSFWEK-GTOFXWBISA-N
MOL000303	caprylic acid		144.24	16.4	0.02	379	WWZKQHOCKIZLMA-UHFFFAOYSA-N
MOL000346	succinic acid		118.1	29.62	0.01	21952380	KDYFGRWQOYBRFD-UHFFFAOYSA-N
MOL000357	Sitogluside		576.95	20.63	0.62	5742590	NPJICTMALKLTFW-OFUAXYCQSA-N
MOL000358	beta-sitosterol		414.79	36.91	0.75	222284	KZJWDPNRJALLNS-VJSFXXLFSA-N
MOL000383	D-Galacturonic acid, homopolymer	DL-Galacturonic acid	194.16	29.75	0.04	84740	IAJILQKETJEXLJ-RSJOWCBRSA-N
MOL000415	rutin		610.57	3.2	0.68	5280805	IKGXIBQEEMLURG-NVPNHPEKSA-N
MOL000422	kaempferol		286.25	41.88	0.24	5280863	IYRMWMYZSQPJKC-UHFFFAOYSA-N
MOL000430	betaine		117.17	40.92	0.01	247	KWIUHFFTVRNATP-UHFFFAOYSA-N
MOL000449	Stigmasterol		412.77	43.83	0.76	5280794	HCXVJBMSMIARIN-PHZDYDNGSA-N
MOL000561	Astragalin		448.41	14.03	0.74	5282102	JPUKWEQWGBDDQB-QSOFNFLRSA-N
MOL000666	hexanal		100.18	55.71	0.01	6184	JARKCYVAAOWBJS-UHFFFAOYSA-N
MOL000667	1-hexanol		102.2	22.04	0.01	8103	ZSIAUFGUXNUGDI-UHFFFAOYSA-N
MOL000676	DBP	dibutyl phthalate	278.38	64.54	0.13	3026	DOIRQSBPFJWKBE-UHFFFAOYSA-N
MOL000703	2-heptanone		114.21	46.56	0.01	8051	CATSNJVOTSVZJV-UHFFFAOYSA-N
MOL000708	WLN: VHR	benzaldehyde	106.13	32.63	0.01	240	HUMNYLRZRPPJDN-UHFFFAOYSA-N
MOL000713	(E)-oct-3-en-2-one	3-OCTEN-2-ONE	126.22	30.5	0.01	5363229	ZCFOBLITZWHNNC-VOTSOKGWSA-N
MOL000748	HMF	5-Hydroxymethylfurfural	126.12	45.07	0.02	237332	NOEGNKMFWQHSLB-UHFFFAOYSA-N
MOL000775	EEE	ETHYL ACETATE	88.12	45.02	0	8857	XEKOWRVHYACXOJ-UHFFFAOYSA-N
MOL000776	OXA	ethanol	46.08	63.21	0	702	LFQSCWFLJHTTHZ-UHFFFAOYSA-N
MOL000785	palmatine		352.44	64.6	0.65	19009	DJDOMQTVQYDGJL-UHFFFAOYSA-N
MOL000860	stearic acid		284.54	17.83	0.14	5281	QIQXTHQIDYTFRH-UHFFFAOYSA-N
MOL000863	Dekan		142.32	17.74	0.01	15600	DIOQZVSQGTUSAI-UHFFFAOYSA-N
MOL000865	hexadecane		226.5	12.32	0.06	11006	DCAYPVUWAIABOU-UHFFFAOYSA-N
MOL000867	Heptadekan		240.53	8.64	0.07	12398	NDJKXXJCMXVBJW-UHFFFAOYSA-N
MOL000869	Henicosane		296.65	8.41	0.15	12403	FNAZRRHPUDJQCJ-UHFFFAOYSA-N
MOL000876	(6R,10R)-6,10,14-trimethylpentadecan-2-one		268.54	23.3	0.1	1810793	WHWDWIHXSPCOKZ-IAGOWNOFSA-N
MOL000879	methyl palmitate		270.51	18.09	0.12	8181	FLIACVVOZYBSBS-UHFFFAOYSA-N
MOL000880	Tricosane		324.71	8.33	0.21	12534	FIGVVZUWCLSUEI-UHFFFAOYSA-N
MOL000885	Dodekan		170.38	17.74	0.02	8182	SNRUBQQJIBEYMU-UHFFFAOYSA-N
MOL000886	tetradecane		198.44	15.94	0.04	12389	BGHCVCJVXZWKCC-UHFFFAOYSA-N
MOL001006	poriferasta-7,22E-dien-3beta-ol	Chondrillasterol	412.77	42.98	0.76	5283663	JZVFJDZBLUFKCA-INYURWPISA-N
MOL001285	octanol		130.26	21.06	0.01	957	KBPLFHHGFOOTCA-UHFFFAOYSA-N
MOL001314	Azelex		188.25	16.9	0.04	19347555	BDJRBEYXGGNYIS-UHFFFAOYSA-N
MOL001393	myristic acid		228.42	21.18	0.07	11005	TUNFSRHWOTWDNC-UHFFFAOYSA-N
MOL001394	Oktadekan		254.56	9.81	0.09	11635	RZJRJXONCZWCBN-UHFFFAOYSA-N
MOL001399	TWT		310.68	8.37	0.18	12405	HOWGUJZVBDQJKV-UHFFFAOYSA-N
MOL001454	berberine		336.39	36.86	0.78	2353	YBHILYKTIRIUTE-UHFFFAOYSA-N
MOL001458	coptisine		320.34	30.67	0.86	72322	XYHOBCMEDLZUMP-UHFFFAOYSA-N
MOL001619	UPL	NONADECANE	268.59	8.52	0.11	12401	LQERIDTXQFOHKA-UHFFFAOYSA-N
MOL001655	oleanolic acid-3-O-β-D-glucuronopyranoside_qt	ZINC13152626	456.78	17.93	0.76	25728252	MIJYXULNPSFWEK-NMOPRTRMSA-N
MOL001729	Crysophanol		254.25	18.64	0.21	10208	LQGUBLBATBMXHT-UHFFFAOYSA-N
MOL001747	Tetracosane		338.74	8.28	0.24	12592	POOSGDOYLQNASK-UHFFFAOYSA-N
MOL001836	n-butyl-β-D-fructopyronoside	n-butyl-beta-d-fructopyranoside	236.3	18.17	0.08	50914217	NAJPAGUETSZHOG-DOLQZWNJSA-N
MOL002046	hexanoic acid		116.18	73.08	0.01	8892	FUZZWVXGSFPDMH-UHFFFAOYSA-N
MOL002245	Chrysophanol-8-O-beta-D-(6'-O-galloyl)-glucopyranoside	CHEMBL109609	568.52	1.92	0.69	5315852	KBGOIDOUXFNKHS-DPALUKPESA-N
MOL002347	(R)-Allantoin	Allantoin	158.14	96.9	0.03	439713	POJWUDADGALRAB-PVQJCKRUSA-N
MOL002379	PTL PENTANAL	Valeraldehyde	86.15	59.53	0	8063	HGBOYTHUEUWSSQ-UHFFFAOYSA-N
MOL002643	delta 7-stigmastenol		414.79	37.42	0.75	12315376	YSKVBPGQYRAUQO-HBPBZKQKSA-N
MOL002714	baicalein		270.25	33.52	0.21	5281605	FXNFHKRTJBSTCS-UHFFFAOYSA-N
MOL002776	Baicalin		446.39	40.12	0.75	64982	IKIIZLYTISPENI-ZFORQUDYSA-N
MOL002897	epiberberine		336.39	43.09	0.78	160876	XXMJRBRPNZVNJR-UHFFFAOYSA-N
MOL003040	Amylol		88.17	76.16	0	6276	AMQJEAYHLZJPGS-UHFFFAOYSA-N
MOL003091	pent-3-en-2-one	3-PENTEN-2-ONE	84.13	50.2	0	637920	LABTWGUMFABVFG-ONEGZZNKSA-N
MOL003507	Heptanol		116.23	17.22	0.01	8129	BBMCTIGTTCKYKF-UHFFFAOYSA-N
MOL003702	geniposide_qt		226.25	39.71	0.1	NA	YYWZXIMXXWRWFF-AVPPRXQKSA-N
MOL003778	pjs-1_qt		456.78	15.83	0.76	NA	MIJYXULNPSFWEK-ICZVBWPOSA-N
MOL003847	Inophyllum E	cis-and-trans-Inophyllolide	402.47	38.81	0.85	5254	YRHQANFINIANSK-UHFFFAOYSA-N
MOL004355	Spinasterol		412.77	42.98	0.76	5281331	JZVFJDZBLUFKCA-FXIAWGAOSA-N
MOL004368	Hyperin		464.41	6.94	0.77	5281643	OVSQVDMCBVZWGM-DTGCRPNFSA-N
MOL004652	(2R,3R,4S,5S,6R)-2-[[(3S,5S,9R,10S,13R,14R,17R)-17-[(E,2R,5S)-5-ethyl-6-methylhept-3-en-2-yl]-10,13-dimethyl-2,3,4,5,6,9,11,12,14,15,16,17-dodecahydro-1H-cyclopenta[a]phenanthren-3-yl]oxy]-6-(hydroxymethyl)oxane-3,4,5-triol	Spinasteryl glucoside	574.93	21.2	0.63	12960505	ITYGLICZKGWOPA-FDZHQVDOSA-N
MOL004664	heptanoic acid		130.21	13.38	0.01	8094	MNWFXJYAOYHMED-UHFFFAOYSA-N
MOL004686	Nonenone		140.25	19.62	0.02	5317045	HDKLIZDXVUCLHQ-BQYQJAHWSA-N
MOL005155	ginsenoside Ro_qt	ZINC8680003	455.77	17.62	0.76	7055468	MIJYXULNPSFWEK-CGXHKNHBSA-N
MOL005325	ginsenoside Ro		957.24	1.98	0.05	11815492	NFZYDZXHKFHPGA-UPULUGQVSA-N
MOL006731	Areginal		74.09	44.33	0	8025	WBJINCZRORDGAQ-UHFFFAOYSA-N
MOL007485	(2S,3S,4S,5R,6R)-6-[[(3S,4aR,6aR,6bS,8aS,12aS,14aR,14bR)-4,4,6a,6b,11,11,14b-heptamethyl-8a-[oxo-[[(2S,3R,4S,5S,6R)-3,4,5-trihydroxy-6-(hydroxymethyl)-2-tetrahydropyranyl]oxy]methyl]-1,2,3,4a,5,6,7,8,9,10,12,12a,14,14a-tetradecahydropicen-3-yl]oxy]-3,4-di	ginsenoside Ro	957.24	1.95	0.05	11815492	NFZYDZXHKFHPGA-QQHDHSITSA-N
MOL007891	2,6-Dimethylpiazine	Pyrazine	108.16	35.27	0.01	7938	HJFZAYHYIWGLNL-UHFFFAOYSA-N
MOL008279	Amyl ketone	6-UNDECANONE	170.33	18.65	0.02	13561	ZPQAKYPOZRXKFA-UHFFFAOYSA-N
MOL008653	Acetylfuran		110.12	49.63	0.01	14505	IEMMBWWQXVXBEU-UHFFFAOYSA-N
MOL008671	PRZ	2-ISOBUTYL-3-METHOXYPYRAZINE	166.25	35.83	0.03	32594	UXFSPRAGHGMRSQ-UHFFFAOYSA-N
MOL008680	acetaldehyde		44.06	42.25	0	177	IKHGUXGNUITLKF-UHFFFAOYSA-N
MOL011389	chikusetsusaponin Ⅳa		795.08	6.82	0.14	13909684	YOSRLTNUOCHBEA-SGVKAIFKSA-N
MOL011390	3-epioleanolic acid		456.78	16.07	0.76	7061302	MIJYXULNPSFWEK-FEUGVMKNSA-N
MOL011404	ginsenoside-Rg2		785.01	20.12	0.82	21599924	AGBCLJAHARWNLA-DQUQINEDSA-N
MOL011944	IPZ	2-Isopropyl-3-methoxypyrazine	152.22	38.55	0.03	33166	NTOPKICPEQUPPH-UHFFFAOYSA-N
MOL012277	3-O-(β-D-glucopyranosiduronic acid) oleanolic acid	Calenduloside E methyl ester	646.95	17.75	0.32	14314623	PLFVAHQBFNVLPJ-VAYXFIKJSA-N
MOL012451	(20r,22r)-2beta,3beta,20,22,26-pentahydroxy-cholestan-7,12-dien-6-one		462.69	17.09	0.85	163094513	VGYHVIBSTDGROO-YJRCXVEWSA-N
MOL012452	(20R,22R)-2β,3β,20,22,26-pentahydroxy-cholestan-7,12-dien-6-one		462.69	10.09	0.85	163094512	VGYHVIBSTDGROO-UHFFFAOYSA-N
MOL012453	18-(β-D-Oxy glucose)-28-Oxo-12-oleanolic acid-3β-3-O-(β-D-glucose)-β-D-glucuronic acid methylester		971.27	2.35	0.05	52945763	FBNHNCMZFHURCE-JYXBHEQSSA-N
MOL012454	18-(β-D-Oxy glucose)-28-Oxo-12-oleanolic acid-3β-3-O-(β-D-glucose)-β-D-glucuronic acid methylester_qt		456.78	17.28	0.76	164643721	MIJYXULNPSFWEK-PVINICTNSA-N
MOL012455	oct-1-en-2-ol	1-OCTEN-2-OL	128.24	23.17	0.01	15372159	LNGYMCOWZUPVOA-UHFFFAOYSA-N
MOL012456	Inokosterone		480.71	9.03	0.83	441828	JQNVCUBPURTQPQ-GYVHUXHASA-N
MOL012457	28-deglucosyl achyranthoside D methyl ester		999.28	6.59	0.09	10373773	HMUVQUSUGZZNNT-VILTWGALSA-N
MOL012458	achyranthoside D trimethyl ester_qt		837.12	67.97	0.16	10440535	IVLBBGZCQSCTPT-JYWPUSNISA-N
MOL012459	28-deglucosyl-chikusetsusaponin,iva		632.92	17.56	0.34	162925485	IUCHKMAZAWJNBJ-QSDPURBLSA-N
MOL012460	28-deglucosyl-chikusetsusaponin,iva_qt	ZINC253476243	456.78	17.27	0.76	124893114	MIJYXULNPSFWEK-HLYVORAMSA-N
MOL012461	28-norolean-17-en-3-ol	Oleanol	412.77	35.93	0.78	101710279	BYIIDRHXMCRKPL-UKCDONGNSA-N
MOL012462	2-Octenal, 2-butyl-	2-Butyloct-2-enal	182.34	18.43	0.03	5362697	LYGMPIZYNJGJKP-BENRWUELSA-N
MOL012463	2β,3β,20α,22α,25-pentahydroxy cholesta-8,14-dien-6-one		462.69	16.14	0.84	102478941	KBDUJCBPMFPAJU-DLKCTXPZSA-N
MOL012464	3-O-(β-D-glucose)-oleanolic acid-28-O-(β-D-glucose)		753.09	7.53	0.17	NA	WJHCGNJBXREQTC-RKSOXPEUSA-N
MOL012465	(3S,4aR,6aR,6bS,8aS,12aS,14aR,14bR)-4,4,6a,6b,11,11,14b-heptamethyl-1,2,3,4a,5,6,7,8,9,10,12,12a,14,14a-tetradecahydropicene-3,8a-diol		428.77	17.16	0.77	21633445	GYCWITAVSTXNTP-VSQYQUPVSA-N
MOL012466	3-O-(β-D-glucuronic acid)-oleanolic acid-28-O-(β-D-glucose)		767.07	17.75	0.16	NA	UYTXJBSTYIORIV-ZFMFQMLCSA-N
MOL012467	3-O-β-D-glucopyranosyl-α-spinalsterol	alpha-Spinasteryl glucoside	574.93	21.2	0.63	146157615	ITYGLICZKGWOPA-DELWOBSHSA-N
MOL012468	3-O-β-D-glucuronopyranoside-6-O-butyl ester		689.04	17.01	0.26	101921676	SSAPGJPMDABFIB-NFTBZABSSA-N
MOL012469	3-O-β-D-glucuronopyranoside-6-O-methyl ester		646.95	17.75	0.32	162906706	PLFVAHQBFNVLPJ-PTDIDCPLSA-N
MOL012470	6-Dodecanone		184.36	10.2	0.03	80165	ZAQZICGOYPRHCK-UHFFFAOYSA-N
MOL012471	achybidensaponin,i		957.24	2.16	0.06	162836698	PFDOCZBCRVFERF-SNUMNITLSA-N
MOL012472	achybidensaponin,i_qt		648.92	10.32	0.32	NA	JIFVBHNAFSPTDO-ZYVOBUBGSA-N
MOL012473	achybidensaponin,ii		809.06	6.83	0.14	162931698	DWNQAPWFHXWEEF-CLKLCWNVSA-N
MOL012474	achybidensaponin,ii_qt		456.78	17.7	0.76	NA	UJJPXLOOLRWFLP-FLUSMBPXSA-N
MOL012475	achyranthesterone A		496.71	3.86	0.83	NA	UYDQOOHBGRAEBT-ZENSGKJHSA-N
MOL012476	achyranthoside Ⅱ		957.24	4.77	0.09	162642274	GNCYMXULNXKROG-FSUMLXKBSA-N
MOL012477	achyranthoside Ⅱ_qt		795.08	6.55	0.18	NA	QCMHPMUCQQUDMZ-UAPVTBHYSA-N
MOL012478	achyranthoside Ⅲ		955.17	10.62	0.05	134692504	UOGGJUUNBPSGHY-LZXYOFOPSA-N
MOL012479	achyranthoside Ⅳ		793.01	20.86	0.11	101926301	JZICHZJWNUYONS-JQNARZGYSA-N
MOL012480	achyranthoside A		955.17	8.31	0.05	85099121	UOGGJUUNBPSGHY-UHFFFAOYSA-N
MOL012481	achyranthoside A_qt		793.01	17.78	0.11	78422615	JZICHZJWNUYONS-UHFFFAOYSA-N
MOL012482	achyranthoside A trimethyl ester		997.26	9.33	0.04	101986999	UUJBKPMTQRYBCZ-ADVBGCFBSA-N
MOL012483	achyranthoside A trimethyl ester_qt		835.1	31.9	0.09	NA	BUTGKENULJBBPB-UXFWWRRLSA-N
MOL012484	achyranthoside c		957.19	4.26	0.08	162642274	GNCYMXULNXKROG-FSUMLXKBSA-N
MOL012485	achyranthoside c_qt		795.03	66.62	0.18	NA	FHMLSFRFOXEUGU-ICJJKWSHSA-N
MOL012486	achyranthoside C butyl dimethyl ester		1041.37	6.44	0.06	162915647	NGSUAFCGWBFATR-HNJXKCMJSA-N
MOL012487	achyranthoside C butyl dimethyl ester_qt		879.21	10.3	0.14	NA	JRVQEJMQQSYPBA-JLRXOKCSSA-N
MOL012488	achyranthoside C dimethyl ester		985.25	6.3	0.07	163042324	QREVWGPFOUVYSF-IODOMGJHSA-N
MOL012489	achyranthoside C dimethyl ester_qt		823.09	71.87	0.16	NA	SIAOEOMSDHDQTH-SJHGMTLGSA-N
MOL012490	achyranthoside C trimethyl ester		999.28	17.74	0.07	102409984	FQMIHRXBIJNIAB-YZPMCCLSSA-N
MOL012491	achyranthoside D		1119.35	2.06	0.04	162988520	VYVPIFXAYNIMKK-WUPAJFIOSA-N
MOL012492	achyranthoside D trimethyl ester		1161.44	2.11	0.04	162911599	NQEXDPMDWABVBK-UQVZQISFSA-N
MOL012493	achyranthoside E		927.16	7.46	0.09	85118552	DVEJWYUSLPQXTD-UHFFFAOYSA-N
MOL012494	achyranthoside E_qt		765	24.15	0.2	15834378	WEUHEQAOZHTARY-JWOAMYESSA-N
MOL012495	achyranthoside E butyl dimethyl ester		1011.34	9.49	0.07	NA	QPXPFGKVBDIMJE-DVXCQRGDSA-N
MOL012496	achyranthoside E butyl dimethyl ester_qt		849.18	19.72	0.15	NA	JSOFVHPTWJVRCR-STGFOTAWSA-N
MOL012497	achyranthoside E dimethyl ester		955.22	8.43	0.08	73015389	GRYXKVCXNLLBSZ-UHFFFAOYSA-N
MOL012498	achyranthoside E dimethyl ester_qt		793.06	6.44	0.18	NA	OMIGTWCEPNQBLA-IVSBEMQFSA-N
MOL012499	achyranthoside E trimethyl ester		969.25	6.32	0.08	100929762	KNJOTYBYFLKHPK-RDVPDCOTSA-N
MOL012500	achyranthoside E trimethyl ester_qt		807.09	9.84	0.17	NA	WVVIARNYZJKWRP-AKRPTWMMSA-N
MOL012501	achyranthoside I		1119.4	1.93	0.04	NA	ZRIGYVYKAXWXMG-SBELIDNYSA-N
MOL012502	bidentatoside,i		955.17	12.41	0.05	21592407	OSASUDJULLHLOS-BQUHXHDSSA-N
MOL012503	bidentatoside,i_qt		793.01	23.85	0.11	NA	PDCHMXXWHPTMAG-YRXHVEFTSA-N
MOL012504	bidentatoside,ii		719.02	8.14	0.26	162880637	AELKSRQERVGUHA-OLFJOLDUSA-N
MOL012505	bidentatoside,ii_qt		556.86	31.76	0.59	NA	NZZADKCZFKEBGZ-IWTCJVCXSA-N
MOL012506	chikusetsusaponin Ⅳ		927.21	14.73	0.06	134744790	KQSFNXMDCOFFGW-KRKKSUQESA-N
MOL012507	chikusetsusaponin I	ZINC256073358	785.14	10.06	0.25	124932965	QOVKKEKBURQILF-SHWREPDISA-N
MOL012508	chikusetsusaponin IVA butyl ester		851.2	52.25	0.11	44566502	UMELIPOCPCVHGJ-GUQBEPFPSA-N
MOL012509	Chikusetsusaponin IVa methyl ester		809.11	17.79	0.13	637855	XPORLJWHBRUXGD-HWIUFREPSA-N
MOL012510	Chikusetsusaponin V butyl ester	CHEMBL3600665	1013.36	2.12	0.05	122184439	RSACINGFZMYPQI-AFIXLBJHSA-N
MOL012511	Chikusetsusaponin V methyl ester		971.27	2.18	0.05	101669622	PYRYQDQZMLGNFX-URKSCUOCSA-N
MOL012512	deglucose chikusetsusaponin Iva		632.92	12.84	0.34	162925485	IUCHKMAZAWJNBJ-QSDPURBLSA-N
MOL012513	deglucose chikusetsusaponin Iva_qt		456.78	14.75	0.76	NA	MIJYXULNPSFWEK-HFLWZDJZSA-N
MOL012514	Ecdysterone-3-O-beta-D-glucopyranoside		628.84	1.33	0.55	162965992	URJMWFNPCOONII-IXJRCFJUSA-N
MOL012515	Ecdysterone-3-O-beta-D-glucopyranoside_qt		466.68	5.83	0.83	23997088	LWKGSSIVTZLHCN-SOVGNJKYSA-N
MOL012516	geniposide		388.41	8.4	0.44	107848	IBFYXTRXDNAPMM-BVTMAQQCSA-N
MOL012517	hederagenin-28-O-β-D-glucopyranosyl ester		634.94	7.98	0.39	21120798	WJMMBVSOQPALFO-DLQTVUGOSA-N
MOL012518	hederagenin-28-O-β-D-glucopyranosyl ester_qt		472.78	16.51	0.74	NA	PGOYMURMZNDHNS-ZUMAJMKZSA-N
MOL012519	Monoglucuronide F	Calenduloside E	632.92	12.84	0.34	176079	IUCHKMAZAWJNBJ-RCYXVVTDSA-N
MOL012520	niuxixinsterone A		602.84	17.55	0.54	NA	KPCQTDWWMAPJKX-BBEXEBBRSA-N
MOL012521	niuxixinsterone B		570.79	18.92	0.59	NA	GXMDSNXEHBYBSF-ZGFJTEIESA-N
MOL012522	niuxixinsterone C		588.81	16.98	0.56	NA	OMCKEPCVIFFIFM-DVYRRINYSA-N
MOL012523	N-trans-feruloyl-3-methoxytyramine-4'-O-β-D-glucopyranoside		505.57	22.17	0.72	163188646	UYSRWDYTMGBBHP-PFDTXSLGSA-N
MOL012524	Hmp-hmpep	N-trans-Feruloyl-3-methoxytyramine	343.41	7.27	0.34	5352115	GRXBVKANHNUZNL-VMPITWQZSA-N
MOL012525	N-trans-feruloyl-3-methoxytyramine-4-O-β-D-glucopyranoside		505.57	22.01	0.73	NA	UYSRWDYTMGBBHP-PFDTXSLGSA-N
MOL012526	oleanolic acid 3-O-[β-D-glucuronopyranoside-6-O-butyl ester]-28-O-β-D-glucopyranoside		851.2	9.17	0.11	NA	UMELIPOCPCVHGJ-NRGCJORVSA-N
MOL012527	oleanolic acid 3-O-[β-D-glucuronopyranoside-6-O-ethyl ester]-28-O-β-D-glucopyranoside		823.14	7.35	0.13	102324861	CDPNNKWBMGRVFC-MUGFHNHMSA-N
MOL012528	oleanolic acid 3-O-[β-D-glucuronopyranoside-6-O-methyl ester]-28-O-β-D-glucopyranoside		809.11	11.75	0.13	162995465	XPORLJWHBRUXGD-GKQIBFBASA-N
MOL012529	oleanolic acid-3-O-β-D-(6'-butyl)-glucuronopyranoside	3beta-[6-Butoxy-6-oxo-6-deoxy-beta-D-glucopyranosyloxy]olean-12-en-28-oic acid	689.04	17.01	0.26	101921676	SSAPGJPMDABFIB-NFTBZABSSA-N
MOL012530	oleanolic acid-3-O-β-D-glucuronopyranoside		632.92	12.84	0.34	NA	IUCHKMAZAWJNBJ-BZWWCITHSA-N
MOL012531	pjs-1		618.94	11.48	0.41	162964453	KMKFOIBUKYMVRJ-WVMBEYTRSA-N
MOL012532	Polypodine B		496.71	17.08	0.81	441833	GMFLGNRCCFYOKL-ACCCYTKYSA-N
MOL012533	quercetin-3-O-rutinoside		610.57	3.2	0.68	162995348	IKGXIBQEEMLURG-NLDZZCJQSA-N
MOL012534	rhapontisterone B		480.71	15.28	0.82	21590111	NKDFYOWSKOHCCO-RVRVBGOXSA-N
MOL012535	rubrosterone		334.45	14.56	0.47	12315102	OMQCWEJQYPUGJG-DTDIXVHCSA-N
MOL012536	Rubschisantherin		458.55	8	0.85	73353444	GRHNKVUUWRVFMM-OYMPBJRDSA-N
MOL012537	Spinoside A		716.95	41.75	0.4	5281325	UODJOGKPOAZZHT-OCCINUARSA-N
MOL012538	stachysterone A		464.71	8.86	0.69	24984906	DSUMGVHMUUADBM-VXUDCIMKSA-N
MOL012539	stachysterone D		462.69	16.4	0.84	15227300	JWXMXJQGIRXWDG-ZPEWUMIJSA-N
MOL012540	zingibroside r1		795.08	9.27	0.13	163024111	WJQOMUVKRDJBGZ-ZXEFTCORSA-N
MOL012541	zingibroside r1_qt		456.78	15.5	0.76	NA	MIJYXULNPSFWEK-BHFHIUOHSA-N
MOL012542	β-ecdysterone	ZINC17147377	480.71	44.23	0.82	27545171	NKDFYOWSKOHCCO-NDIIMYNGSA-N
BATMAN-TCM
Molecule Name		PubChem CID	Inchkey
Chrysophanol-8-O-Beta-D-(6'-O-Galloyl)-Glucopyranoside	568.482	5315852	KBGOIDOUXFNKHS-DPALUKPESA-N
Ecdysterone-3-O-Beta-D-Glucopyranoside	628.748	162965992	URJMWFNPCOONII-IXJRCFJUSA-N
Rubrosterone	333.4	12315102	OMQCWEJQYPUGJG-DTDIXVHCSA-N
Dibutyl Phthalate	278.34	3026	DOIRQSBPFJWKBE-UHFFFAOYSA-N
Chrysophanol	254.24	10208	LQGUBLBATBMXHT-UHFFFAOYSA-N
Spinoside A	716.855	5281325	UODJOGKPOAZZHT-OCCINUARSA-N
Rubschisantherin	458.501	73353444	GRHNKVUUWRVFMM-OYMPBJRDSA-N
Ecdysterone	480.6	27545171	NKDFYOWSKOHCCO-NDIIMYNGSA-N
Alpha-Spinasterol-Beta-D-Glucoside;Spinasteryl glucoside	574.423	12960505	ITYGLICZKGWOPA-FDZHQVDOSA-N
Inokosterone	480.6	441828	JQNVCUBPURTQPQ-GYVHUXHASA-N
TCM@Taiwan
Molecule Name	Fomula	WM		PubChem CID	Inchkey
alpha-Spinasterol-beta-D-glucoside	C35H58O6	574.831	Spinasteryl glucoside	12960505	ITYGLICZKGWOPA-FDZHQVDOSA-N
Chrysophanol-8-O-beta-D-(6'-O-galloyl)-glucopyranoside	C28H24O13	568.482		5315852	KBGOIDOUXFNKHS-DPALUKPESA-N
Ecdysterone-3-O-beta-D-glucopyranoside	C32H52O12	628.748	Ecdysterone-3-O-Beta-D-Glucopyranoside	162965992	URJMWFNPCOONII-IXJRCFJUSA-N
Inophyllum E	C25H22O5	402.439	cis-and-trans-Inophyllolide	5254	YRHQANFINIANSK-UHFFFAOYSA-N
Rubschisantherin	C25H30O8	458.501		73353444	GRHNKVUUWRVFMM-OYMPBJRDSA-N
Spinoside A	C39H56O12	716.855		5281325	UODJOGKPOAZZHT-OCCINUARSA-N
TCM-ID
TCMID	Formula	Molecule Name		WM	PubChem CID	Inchkey
TCMC118	C30H48O3	(4As,6As,6Br,10S,12Ar)-10-Hydroxy-2,2,6A,6B,9,9,12A-Heptamethyl-1,3,4,5,6,6A,7,8,8A,10,11,12,13,14B-Tetradecahydropicene-4A-Carboxylic Acid	oleanoic acid	456.36	10494	MIJYXULNPSFWEK-GTOFXWBISA-N
TCMC209	C4H6N4O3	[(4S)-2,5-Dioxoimidazolidin-4-Yl]Urea	(S)-(+)-allantoin	158.04	439713	POJWUDADGALRAB-PVQJCKRUSA-N
TCMC255	C15H12O4	1,8-Dihydroxy-3-Methyl-4A,9A-Dihydroanthracene-9,10-Dione	NCGC00160154-01	256.07	24867638	RJOOIZGQOJJWMS-UHFFFAOYSA-N
TCMC348	C27H44O7	20-Hydroxyecdysone	20-HYDROXYECDYSONE	480.31	5459840	NKDFYOWSKOHCCO-YPVLXUMRSA-N
TCMC553	C6H6O3	5-Hydroxymethyl-Furfural	5-HYDROXYMETHYLFURFURAL	126.03	237332	NOEGNKMFWQHSLB-UHFFFAOYSA-N
TCMC655	C4H6N4O3	Allantoin		158.04	439713	POJWUDADGALRAB-PVQJCKRUSA-N
TCMC724	C30H48O5	Arjunolic Acid		488.35	73641	RWNHLTKFBKYDOJ-DDHMHSPCSA-N
TCMC2667	C30H50O	Beta-Amyrin		426.39	73145	JFSHUTJDVKUMTJ-QHPUVITPSA-N
TCMC801	C29H50O	Beta-Sitosterol		414.39	222284	KZJWDPNRJALLNS-VJSFXXLFSA-N
TCMC803	C30H50O2	Betulin		442.38	72326	FVWJYYTZTCVBKE-ROUWMTJPSA-N
TCMC805	C30H46O3	Betunolic Acid		454.34	122844	SLJTWDNVZKIDAU-SVAFSPIFSA-N
TCMC7074	C40H62O13	Bidentatoside Ii	Bidentatoside II	748.403	101129998	FDBQAHJAKLTDEC-UBBKOKMRSA-L
TCMC7204	C49H78O19	Chikusetsu Saponin V Methyl Ester		970.514	101669622	PYRYQDQZMLGNFX-URKSCUOCSA-N
TCMC912	C15H10O4	Chrysophanol		254.06	10208	LQGUBLBATBMXHT-UHFFFAOYSA-N
TCMC995	C35H60O6	Daucosterol	Sitogluside	576.44	5742590	NPJICTMALKLTFW-OFUAXYCQSA-N
TCMC1023	C5H9NO4	D-Glutamate	D-glutamic acid	147.05	23327	WHUUTDBJXJRKMK-GSVOUGTGSA-N
TCMC1031	C16H22O4	Dibutyl Phthalate		278.15	3026	DOIRQSBPFJWKBE-UHFFFAOYSA-N
TCMC2411	C30H48O3	Epi-Oleanolic Acid	3-Epioleanolic acid	456.36	7061302	MIJYXULNPSFWEK-FEUGVMKNSA-N
TCMC1192	C30H50O	Friedeline		426.39	91472	OFMXGFHWLZPCFL-SVRPQWSVSA-N
TCMC1480	C5H9NO4	L-Glutamate		147.05	44272391	WHUUTDBJXJRKMK-VKHMYHEASA-N
TCMC1515	C30H50O	Lupeol		426.39	259846	MQYXUWHLBZFQQO-QGTGJCAVSA-N
TCMC2685	C25H24O5	Na	Inophyllolide chromanol	404.16	15223670	BXENDTPSKAICGV-UHFFFAOYSA-N
TCMC1786	C30H48O3	Oleanolic Acid		456.36	10494	MIJYXULNPSFWEK-GTOFXWBISA-N
TCMC1830	C16H32O2	Palmitic Acid		256.24	985	IPCSVZSSVZVIGE-UHFFFAOYSA-N
TCMC2129	C30H50O	Taraxerol		426.39	92097	GGGUGZHBAOMSFJ-GADYQYKKSA-N
TCMC2232	C29H50O2	Vitamin E		430.38	14985	GVJHHUAWPYXKBD-IEOSBIPESA-N
TCMC4325	C29H48O	Α-Spinasterol	Spinasterol	412.371	5281331	JZVFJDZBLUFKCA-FXIAWGAOSA-N
TCMC5982	C35H58O6	Α-Spinasterol-Β-D-Glucoside	Spinasteryl glucoside	574.423	12960505	ITYGLICZKGWOPA-FDZHQVDOSA-N

## Sheet: DA
TCMSP							Review		BATMAN-TCM	TCM-ID
MOL ID	Molecule Name	WM	OB	DL	Pubchem ID	InChIKey	Molecule Name	PubChem CID	Japonine	TCMC2809	C15H18O	7-Hydroxycadalin	214.14
MOL009314	Cantleyine	207.25	70.62	0.08	442515	MJGLQDXKEOEIFB-LDWIPMOCSA-N	1-Caffeoyl-quinic acid	10155076	Japondipsaponin E1	TCMC1548	C7H8O	Metacresol	108.06
MOL000652	Venoterpine	149.21	68.97	0.04	NA	IOIGOIPHPUCFOB-HZGVNTEJSA-N	2,6-Dihydroxycinnamic acid	22323399		TCMC1786	C30H48O3	Oleanolic_Acid	456.36
MOL000651	Sweroside aglycone	196.22	68.68	0.08	203797	HBAKFDGYROBYSH-BKPPORCPSA-N	3,4-Di-O-caffeoylquinic acid	5281780		TCMC182	C9H8O4	(Z)-3-(3,4-Dihydroxyphenyl)Prop-2-Enoic Acid	180.04
MOL009313	Mesitol	136.21	65.67	0.03	10698	BPRYUXCVCCNUFE-UHFFFAOYSA-N	3,5-Di-O-caffeoylquinic acid	6474310		TCMC1843	C7H8O	P-Cresol	108.06
MOL003152	Gentisin	258.24	64.06	0.21	5281636	XOXYHGOIRWABTC-UHFFFAOYSA-N	4,5-di-O-Caffeoylquinic acid	6474309		TCMC1871	C6H6O	Phenol	94.04
MOL009323	Sylvestroside III_qt	378.51	56.47	0.43	NA	HPPQDJKDCBOQBR-HORHJMKNSA-N	4-O-Caffeoylquinic acid	9798666		TCMC2216	C30H48O3	Ursolic Acid	456.36
MOL009312	(E,E)-3,5-Di-O-caffeoylquinic acid	516.49	48.14	0.68	NA	KRZBCHWVBQOTNZ-ZURXXRFOSA-N	5-O-Caffeoylquinic acid	5280633		TCMC2484	C10H18O	Terpineol	154.14
MOL009322	Sylvestroside III	686.83	48.02	0.53	NA	MALYQXLMMWQXME-YWSLBQKTSA-N	Akebia saponin D	14284436		TCMC2661	C16H24O10	Loganic Acid	376.14
MOL008188	Japonine	295.36	44.11	0.25	442915	XTBMLWZKNWXUHV-UHFFFAOYSA-N	Asperosaponin VI	14284436		TCMC2681	C17H26O10	Loganin	390.15
MOL009317	Cauloside A_qt	444.72	43.32	0.81	NA	CPPAMFUQVBDPTG-XDGYBBFPSA-N	Caffeic acid	689043		TCMC418	C25H24O12	3,4-Dicaffeoylquinic Acid	516.13
MOL000358	beta-sitosterol	414.79	36.91	0.75	222284	KZJWDPNRJALLNS-VJSFXXLFSA-N	Cantleyoside	101614437		TCMC469	C25H24O12	4,5-Dicaffeoylquinic Acid	516.13
MOL000359	sitosterol	414.79	36.91	0.75	12303645	KZJWDPNRJALLNS-ZFVHJZABSA-N	CaulosideA	441928		TCMC493	C8H10O2	4-Ethylresorcinol	138.07
MOL001681	methyl (1R,4aS,6S,7R,7aS)-1,6-dihydroxy-7-methyl-1,4a,5,6,7,7a-hexahydrocyclopenta[d]pyran-4-carboxylate	228.27	29.99	0.1	10466307	XWOHZIIPBYAMJX-KHBMLBSESA-N	Chlorogenic acid	1794427		TCMC801	C29H50O	Beta-Sitosterol	414.39
MOL000551	Hederagenol	472.78	22.42	0.74	73299	PGOYMURMZNDHNS-MYPRUECHSA-N	Dipsacus saponin A	57399039		TCMC847	C9H8O4	Caffeic Acid	180.04
MOL000357	Sitogluside	576.95	20.63	0.62	5742590	NPJICTMALKLTFW-OFUAXYCQSA-N	Dipsacus saponin B	3081325		TCMC897	C16H18O9	Chlorogenic Acid	354.1
MOL000511	ursolic acid	456.78	16.77	0.75	64945	WCGUUGGRBIKTOS-GPOJBZKASA-N	Dipsacus saponin V	3081325
MOL003107	Akebiasaponin D_qt	472.78	16.44	0.74	NA	PGOYMURMZNDHNS-YCAMUBHUSA-N	Dipsanoside A	11722285
MOL001982	disacoside B_qt	472.78	15.83	0.74	40469778	PGOYMURMZNDHNS-GBTZXOCISA-N	Dipsanoside B	11686867
MOL000661	PENTACOSANOIC ACID	382.75	14.57	0.37	10468	MWMPEAHGUXCSMY-UHFFFAOYSA-N	Dipsanoside C	25053635
MOL001450	Lacceric acid	480.96	12.8	0.49	19255	ICAIHSUWWZJGHD-UHFFFAOYSA-N	Dipsanoside D	25053698
MOL009315	Cantleyoside	211.9	11.18	0.01	NA	MRYZFSAURXJWHV-QWWZWVQMSA-N	Dipsanoside E	101446699
MOL001980	Helixin	751.07	9.63	0.14	73296	KEOITPILCOILGM-LLJOFIFVSA-N	Dipsanoside F	101446700
MOL009318	Dipsacobioside	751.07	8.94	0.14	NA	KEOITPILCOILGM-XTPDDMFRSA-N	Dipsanoside G	25053755
MOL009321	Macranthoidin B	1399.71	6.64	0	NA	RKINZCVTEPSBCI-SRSHCTICSA-N	Dipsanoside H	11722285
MOL001680	Loganin	390.43	5.9	0.44	87691	AMBQHHVBBHTQBF-UOUCRYGSSA-N	Hederagenin	73299
MOL000650	1H,3H-Pyrano(3,4-c)pyran-1-one, 5-ethenyl-6-(beta-D-glucopyranosyloxy)-4,4a,5,6-tetrahydro-, (4aS-(4aalpha,5beta,6alpha))-	358.38	4.96	0.38	161036	VSJGJMKGNMDJCI-ZASXJUAOSA-N	HN saponin F	171596
MOL009316	Cauloside A	576.85	4.77	0.44	NA	IXNDWUQCJYFRNO-QFCDGPBNSA-N	Lisianthioside	21769613
MOL003041	macranthoidin A	1237.55	4.15	0.01	NA	VUEGHZSQVJADCO-PSPPMKRXSA-N	Loganic acid	89640
MOL009319	Dipsaeussaponin B	1221.55	2.44	0.03	NA	XFQHPZLNJGZIIH-UDMUSMTNSA-N	Loganin	87691
MOL007305	(1S,3S,4R,5S)-3,4-bis[[(E)-3-(3,4-dihydroxyphenyl)acryloyl]oxy]-1,5-dihydroxy-cyclohexane-1-carboxylic acid	516.49	1.78	0.69	10324242	UFCLZKMFXSILNL-KDBOUVDRSA-N	Macranthoidin A	14564503
MOL003106	Akebiasaponin D	929.23	1.67	0.07	NA	CCRXMHCQWYVXTE-FVNNMNCBSA-N	Macranthoside B	11693756
							Oleanolic acid	10494
							Sweroside	161036
							Sylvestroside III	101967018
							Sylvestroside IV	122228276
							Triplostoside A	122228278
							Vanillic acid	8468
							α-Hederin	73296

## Sheet: Bioactive
Compound	Category
berberine	alkaloid
epiberberine	alkaloid
coptisine	alkaloid
palmatine	alkaloid
Isochlorogenic acid A	carboxylic ester
Baicalin	flavonoid
Baicalein	flavonoid
Inophyllum E	flavonoid
wogonin	flavonoid
kaempferol	flavonoid
quercetin	flavonoid
Spinoside A	glycoside
Sylvestroside III	Iridoids
Sweroside	Iridoids
Loganic acid	Iridoids
loganin	Iridoids
loganetin	Iridoids
2,6-Dihydroxycinnamic acid	polyphenol
Caffeate	polyphenol
Japonine	quinolines
Chondrillasterol	steroid
Spinasterol	steroid
Sitogluside	steroid
Stigmasterol	steroid
β-ecdysterone	steroid
Sitosterol	steroid
delta 7-stigmastenol	steroid
Arjunolic Acid	triterpenoid
Oleanol	triterpenoid
Cauloside A	triterpenoid
Gentisin	xanthones
